# Supplementary material
Source: ML conference proceedings conference paper supplement (https://proceedings.neurips.cc/paper_files/paper/2017/hash/3a15c7d0bbe60300a39f76f8a5ba6896-Abstract.html)
Supplement: Supplementary file [file 3a15c7d0bbe60300a39f76f8a5ba6896-Supplemental.zip]

---

# Supplementary Material for Adaptive Clustering through Semidefinite Programming

---

**Martin Royer**

Laboratoire de Mathématiques d'Orsay, Univ. Paris-Sud, CNRS,  
Université Paris-Saclay,  
91405 Orsay, France  
martin.royer@math.u-psud.fr

## A Intermediate results

### Generic controls for exact recovery

Let  $\hat{\Gamma}$  be any estimator of  $\Gamma$  and let  $\hat{B} := \arg \max_{B \in \mathcal{C}_K} \langle \hat{\Lambda} - \hat{\Gamma}, B \rangle$ .

**Theorem A.1.** *For  $c_1, c_2 > 0$  absolute constants suppose that  $|\hat{\Gamma} - \Gamma|_V \leq \bar{\gamma}_n^2$  with probability  $1 - c_1/n$ , and that*

$$m\Delta^2(\mu) \geq c_2 \left( \sigma^2(n + m \log n) + \mathcal{V}^2(\sqrt{n + m \log n}) + \bar{\gamma}_n^2 + \delta^2(\sqrt{n} + m) \right), \quad (\text{A.1})$$

*then we have  $\hat{B} = B^*$  with probability larger than  $1 - c_1/n$*

In the case where the number of groups is unknown we study  $\tilde{B} := \arg \max_{B \in \mathcal{C}} \langle \hat{\Lambda} - \hat{\Gamma}, B \rangle - \hat{\kappa} \text{tr}(B)$  for  $\hat{\kappa} \in \mathbb{R}$ .

**Theorem A.2.** *For  $c_3, c_4, c_5 > 0$  absolute constants suppose that  $|\hat{\Gamma} - \Gamma|_\infty \leq \bar{\gamma}_n^2$  with probability  $1 - c_3/n$ . Suppose that (A.1) is satisfied and that the following condition on  $\hat{\kappa}$  is satisfied*

$$c_4 \left( \mathcal{V}^2 \sqrt{n} + \sigma^2 n + \bar{\gamma}_n^2 + \delta^2 \sqrt{n} \right) < c_5 \hat{\kappa} < m\Delta^2(\mu), \quad (\text{A.2})$$

*then we have  $\tilde{B} = B^*$  with probability larger than  $1 - c_3/n$*

### Concentration of random subgaussian Gram matrices

A key result in our proof is the following concentration bound on the Gram matrix of centered, subgaussian, independent random variables.

**Lemma A.1.** *For some absolute constant  $c_* > 0$ , for  $a \in [n]$  let  $E_a$  be centered, independent random vectors in  $\mathbb{R}^d$ ,  $E_a \sim \text{subg}(\Sigma_a)$ . Let  $\mathbf{E} := \begin{bmatrix} E_1 \\ \vdots \\ E_n \end{bmatrix} \in \mathbb{R}^{n \times d}$  then  $\forall t \geq 0$*

$$\mathbb{P} \left[ \left| \mathbf{E}\mathbf{E}^T - \mathbb{E}[\mathbf{E}\mathbf{E}^T] \right|_{op} \geq 2 \max_{a \in [n]} |\Sigma_a|_F \sqrt{t} + 2 \max_{a \in [n]} |\Sigma_a|_{op} t \right] \leq 9^n 2e^{-c_* t}. \quad (\text{A.3})$$

## B Main proofs

### B.1 Proof of Proposition 1: identifiability

Suppose that  $X_1, \dots, X_n$  are  $(\mathcal{G}, \mu, \delta)$ -clustered with  $|\mathcal{G}| = K$ , and  $\rho(\mathcal{G}, \mu, \delta) > 4$ . Then we remark that for  $(a, b) \in [n]^2$ ,  $a \stackrel{\mathcal{G}}{\sim} b$  is equivalent to  $|\nu_a - \nu_b|_2 \leq 2\delta$  because:

- if  $a \stackrel{\mathcal{G}}{\sim} b$  then there exist  $k \in [K]$  such that  $|\nu_a - \nu_b|_2 \leq |\nu_a - \mu_k|_2 + |\mu_k - \nu_b|_2 \leq 2\delta$
- if  $a \not\stackrel{\mathcal{G}}{\sim} b$  then there exist  $(k, l) \in [K]^2$  such that  $|\nu_a - \nu_b|_2 \geq |\mu_k - \mu_l|_2 - |\nu_a - \mu_k|_2 - |\nu_b - \mu_l|_2 > 4\delta - 2\delta > 2\delta$ .

Now suppose there exist  $\mathcal{G}'$  such that  $X_1, \dots, X_n$  are  $(\mathcal{G}', \mu', \delta')$ -clustered with  $|\mathcal{G}'| = K$  and  $\rho(\mathcal{G}', \mu', \delta') > 4$ . By symmetry we can assume  $\delta' \leq \delta$ , and the previous remark shows that  $\mathcal{G}'$  is a sub-partition of  $\mathcal{G}$ , ie  $\mathcal{G}$  preserves the structure of  $\mathcal{G}'$ . But since  $|\mathcal{G}| = |\mathcal{G}'|$  this implies  $\mathcal{G} = \mathcal{G}'$ .  $\square$

## B.2 Exact recovery with high probability

The proof for Theorem 1 (respectively Theorem 2) is a composition of Theorem A.1 (respectively Theorem A.2) and Proposition .

In this section, under Hypothesis (1), we have  $\forall k \in [K], \forall a \in G_k : X_a \sim \text{subg}(\Sigma_a)$ . For  $k \in [K]$ , we define  $\sigma_k^2 := \max_{a \in G_k} |\Sigma_a|_{op} \leq \sigma^2$ ,  $\mathcal{V}_k^2 := \max_{a \in G_k} |\Sigma_a|_F \leq \mathcal{V}^2$ ,  $\gamma_k^2 := \max_{a \in G_k} \text{tr}(\Sigma_a) \leq \gamma^2$ .

A number of proofs in this section are adapted from the proof ensemble of [1]. In it the authors use a latent model for variable clustering. A comparable model in this work would require to impose the following conditions on  $X_1, \dots, X_n$ : identically distributed variables within a group (implying  $\delta = 0$ ) and isovolumic, Gaussian distributions.

### B.2.1 Proof of Theorem A.1

In this theorem we only need to consider  $B \in \mathcal{C}_K$ , but the proof of Theorem A.2 is similar to this one, hence we will start by considering the more general  $B \in \mathcal{C}$  and use  $B \in \mathcal{C}_K$  at a later stage of the proof. Thus we want to prove that under some conditions, with high probability:

$$\langle \hat{\Lambda} - \hat{\Gamma}, B^* - B \rangle > 0 \text{ for all } B \in \mathcal{C} \setminus \{B^*\} \quad (\text{B.1})$$

For  $(a, b) \in G_k \times G_l$  for  $(k, l) \in [K]^2$ , let:

$$\begin{aligned} (S_1)_{ab} &:= -|\mu_k - \mu_l|_2^2/2 \\ (W_1)_{ab} &:= \langle \nu_a - \mu_k, \nu_b - \mu_l \rangle \\ (W_2)_{ab} &:= \langle \mu_k - \nu_a + \nu_b - \mu_l + E_b - E_a, \mu_k - \mu_l \rangle \\ (W_3)_{ab} &:= \langle E_b - E_a, \nu_a - \mu_k + \mu_l - \nu_b \rangle \\ (W_4)_{ab} &:= (\langle E_a, E_b \rangle - \Gamma_{ab}) \\ (W_5)_{ab} &:= (\Gamma - \hat{\Gamma})_{ab} \end{aligned} \quad (\text{B.2})$$

**Lemma B.1.** *Proving (B.1) reduces to proving*

$$\langle S_1 + W_1 + W_2 + W_3 + W_4 + W_5, B^* - B \rangle > 0 \text{ for all } B \in \mathcal{C} \setminus \{B^*\}. \quad (\text{B.3})$$

The proof for Lemma B.1 is found in section B.2.3. So we need only concern ourselves with the quantities  $S_1, W_1, W_2, W_3, W_4, W_5$ . The term  $S_1$  contains our uncorrupted signal and since  $\langle S_1, B^* \rangle = 0$  it writes:

$$\langle S_1, B^* - B \rangle = \sum_{1 \leq k \neq l \leq K} \frac{1}{2} |\mu_k - \mu_l|_2^2 |B_{G_k G_l}|_1 \quad (\text{B.4})$$

The other parts are noisy and must be controlled. The term  $W_2$  is a simple subgaussian form controlled through the following lemma, proved in section B.2.4:

**Lemma B.2.** *For  $c'_2 > 0$  absolute constant, with probability greater than  $1 - 1/n$ :*

$$\forall B \in \mathcal{C}, \quad |\langle W_2, B^* - B \rangle| \leq \sum_{1 \leq k \neq l \leq K} \left( 2\delta + \sqrt{c'_2 (\log n) (\sigma_k^2 + \sigma_l^2)} \right) |\mu_k - \mu_l|_2 |B_{G_k G_l}|_1. \quad (\text{B.5})$$

To control the other noisy terms we now introduce a deterministic result:

**Lemma B.3.** For any symmetric matrix  $W \in \mathbb{R}^{n \times n}$  we have:

$$\begin{aligned} \forall B \in \mathcal{C}, \quad |\langle W, B^* - B \rangle| \leq & 6|B^*W|_\infty \sum_{1 \leq k \neq l \leq K} |B_{G_k G_l}|_1 \\ & + |W|_{op} \left[ \sum_{1 \leq k \neq l \leq K} |B_{G_k G_l}|_1 / m + (\text{tr}(B) - K) \right]. \end{aligned} \quad (\text{B.6})$$

The proof for Lemma B.3 will be found in [1], p.21-22 until eq. (58).

As  $B^*1 = 1$  and  $B^* \geq 0$ ,  $|B^*W|_\infty \leq |W|_\infty$  so we use the lemma on terms  $W_1$  and  $W_3$  by bounding  $|W|_\infty$  and  $|W|_{op}$ : for the term  $W_1$  we use  $|W_1|_\infty \leq \delta^2$  so  $|W_1|_{op} \leq \delta^2 \sqrt{n}$ . To control the term  $W_3$ , we use the subgaussian tail bound of (B.25) with  $|\nu_a - \mu_k + \mu_l - \nu_b|_2 \leq 2\delta$  and a union bound over  $(a, b) \in [n]^2$ . We get that for  $c'_3 > 0$  absolute constant, with probability greater than  $1 - 1/n$ ,  $|W_3|_\infty \leq \sqrt{c'_3(\log n)\sigma^2\delta^2}$  and  $|W_3|_{op} \leq \sqrt{c'_3(\log n)\sigma^2\delta^2} \times \sqrt{n}$  therefore with probability greater than  $1 - 1/n$ ,  $\forall B \in \mathcal{C}$ :

$$|\langle W_1, B^* - B \rangle| \leq \delta^2 \left[ \sum_{1 \leq k \neq l \leq K} |B_{G_k G_l}|_1 (6 + \frac{\sqrt{n}}{m}) + \sqrt{n}(\text{tr}(B) - K)_+ \right] \quad (\text{B.7})$$

$$|\langle W_3, B^* - B \rangle| \leq \sqrt{c'_3(\log n)\sigma^2\delta^2} \left[ \sum_{1 \leq k \neq l \leq K} |B_{G_k G_l}|_1 (6 + \frac{\sqrt{n}}{m}) + \sqrt{n}(\text{tr}(B) - K)_+ \right] \quad (\text{B.8})$$

For the term  $W_4$  we introduce the following lemma, proved in section B.2.5:

**Lemma B.4.** For  $c'_4, c''_4 > 0$  absolute constants, with probability larger than  $1 - 2/n$ :

$$\begin{aligned} \forall B \in \mathcal{C}, \quad |\langle W_4, B^* - B \rangle| \leq & \left[ 6c'_4(\mathcal{V}^2 \sqrt{\log n} + \sigma^2 \log n) / \sqrt{m} + \right. \\ & \left. c''_4(\mathcal{V}^2 \sqrt{n} + \sigma^2 n) / m \right] \sum_{1 \leq k \neq l \leq K} |B_{G_k G_l}|_1 + (\text{tr}(B) - K)_+ c''_4(\mathcal{V}^2 \sqrt{n} + \sigma^2 n). \end{aligned} \quad (\text{B.9})$$

Lastly as the term  $W_5$  is diagonal we have  $|W_5|_{op} = |W_5|_\infty$  and  $|B^*W_5|_\infty \leq |W_5|_\infty / m$  therefore:

$$\forall B \in \mathcal{C}, \quad |\langle W_5, B^* - B \rangle| \leq |W_5|_\infty \left[ \frac{7}{m} \sum_{1 \leq k \neq l \leq K} |B_{G_k G_l}|_1 + (\text{tr}(B) - K)_+ \right] \quad (\text{B.10})$$

Using those controls of  $W_1, W_2, W_3, W_4, W_5$ , in combination in a union bound in (B.3) we get for  $c'_1 > 0$  absolute constant, with probability greater than  $1 - c'_1/n$ :  $\forall B \in \mathcal{C}$ ,

$$\begin{aligned} \langle S_1 + W_1 + W_2 + W_3 + W_4 + W_5, B^* - B \rangle \geq & \sum_{1 \leq k \neq l \leq K} \left[ \frac{1}{2} |\mu_k - \mu_l|_2^2 - \right. \\ & \left( 2\delta + \sqrt{2c'_2(\log n)\sigma^2} \right) |\mu_k - \mu_l|_2 - (6c'_4 \frac{\mathcal{V}^2 \sqrt{\log n} + \sigma^2 \log n}{\sqrt{m}} + c''_4 \frac{\mathcal{V}^2 \sqrt{n} + \sigma^2 n}{m}) \\ & - \frac{7}{m} |W_5|_\infty - (6 + \frac{\sqrt{n}}{m})(\delta^2 + \sqrt{c'_3(\log n)\sigma^2\delta^2}) |B_{G_k G_l}|_1 \\ & \left. - (\text{tr}(B) - K)_+ [c''_4(\mathcal{V}^2 \sqrt{n} + \sigma^2 n) + (\delta^2 + \sqrt{c'_3(\log n)\sigma^2\delta^2}) \sqrt{n} + |W_5|_\infty] \right] \end{aligned} \quad (\text{B.11})$$

We now use the fact that for this theorem we are only considering  $B \in \mathcal{C}_K$ , ie matrices such that  $\text{tr}(B) = K$  so we can discard the last line of (B.11). In this particular context we can improve the control provided by Lemma B.3 for  $W_5$ : as  $\text{tr}(B^*) = K$ , we have for  $\alpha \in \mathbb{R}$ :  $|\langle W_5, B^* - B \rangle| \leq |\langle W_5 - \alpha I_n, B^* - B \rangle| + |\alpha(\text{tr}(B) - K)|$ . So by choosing  $\alpha = (\max_a (W_5)_{aa} + \min_a (W_5)_{aa})/2$ , we have  $|W_5 - \alpha I_n|_{op} = |W_5 - \alpha I_n|_\infty = |W_5|_V/2$  and therefore:

$$\forall B \in \mathcal{C}_K \quad |\langle W_5, B^* - B \rangle| \leq |W_5|_V \frac{7}{2m} \sum_{1 \leq k \neq l \leq K} |B_{G_k G_l}|_1 \quad (\text{B.12})$$

In consequence we can replace  $|W_5|_\infty$  by  $|W_5|_V/2$  in the second line of (B.11), and with another union bound, by assumption we replace  $|W_5|_V/2$  by  $\bar{\gamma}_n^2/2$ .

Lastly Lemma 3 p. 17 from [1] shows the only matrix in  $\mathcal{C}_K$  whose support is included in  $\text{supp}(B^*)$  is  $B^*$ , therefore  $B \in \mathcal{C}_K \setminus \{B^*\}$  implies  $\sum_{1 \leq k \neq l \leq K} |B_{G_k G_l}|_1 > 0$ . Hence for  $c_2 > 0$  absolute constant, the following condition on  $\Delta(\mu)$  is sufficient to ensure exact recovery with probability larger than  $1 - c_1/n$ :

$$\Delta^2(\mu) \geq c_2 [\sigma^2 m \log n + \mathcal{V}^2 \sqrt{m \log n} + \mathcal{V}^2 \sqrt{n} + \sigma^2 n + \bar{\gamma}_n^2 + \delta^2(\sqrt{n} + m)] \times \frac{1}{m} \quad (\text{B.13})$$

This concludes the proof for Theorem A.1.  $\square$

## B.2.2 Proof of Theorem A.2: adaptive exact recovery

In this Theorem we need to take into account the additional penalization term  $\hat{\kappa} \text{tr}(B)$ . Notice it is equivalent to a correction by  $\hat{\kappa} I_n$  of our estimator  $\hat{\Lambda} - \hat{\Gamma}$ , therefore for  $B \in \mathcal{C}$ ,  $\langle \hat{\Lambda} - \hat{\Gamma} - \hat{\kappa} I_n, B^* - B \rangle = \langle \hat{\Lambda} - \hat{\Gamma}, B^* - B \rangle + \hat{\kappa} \times (\text{tr}(B) - K)$ . Therefore for Theorem A.2 we can follow the same proof as in Theorem A.1 until establishing (B.11), at which point we can use a union bound to use the assumption  $|W_5|_\infty \leq \bar{\gamma}_n^2$ . Consequently we have with probability greater than  $1 - c'_1/n$ :  $\forall B \in \mathcal{C}$ ,

$$\begin{aligned} \langle S_1 + W_1 + W_2 + W_3 + W_4 + W_5, B^* - B \rangle &\geq \sum_{1 \leq k \neq l \leq K} \left[ \frac{1}{2} |\mu_k - \mu_l|_2^2 \right. \\ &\quad - \left( 2\delta + \sqrt{2c'_2(\log n)\sigma^2} \right) |\mu_k - \mu_l|_2 - (6c'_4 \frac{\mathcal{V}^2 \sqrt{\log n} + \sigma^2 \log n}{\sqrt{m}} + c''_4 \frac{\mathcal{V}^2 \sqrt{n} + \sigma^2 n}{m}) \\ &\quad - \frac{7}{m} \bar{\gamma}_n^2 - (6 + \frac{\sqrt{n}}{m})(\delta^2 + \sqrt{c'_3(\log n)\sigma^2 \delta^2}) \Big] |B_{G_k G_l}|_1 \\ &\quad - (\text{tr}(B) - K)_+ [c''_4(\mathcal{V}^2 \sqrt{n} + \sigma^2 n) + (\delta^2 + \sqrt{c'_3(\log n)\sigma^2 \delta^2}) \sqrt{n} + \bar{\gamma}_n^2] + \hat{\kappa}(\text{tr}(B) - K) \end{aligned} \quad (\text{B.14})$$

Using the assumption (A.1) of Theorem A.2 there exist  $c'_2 > 0$  such that with probability greater than  $1 - c'_1/n$ :  $\forall B \in \mathcal{C}$ ,

$$\begin{aligned} \langle S_1 + W_1 + W_2 + W_3 + W_4, B^* - B \rangle &\geq c'_2 \Delta^2(\mu) \sum_{1 \leq k \neq l \leq K} |B_{G_k G_l}|_1 \\ &\quad - (\text{tr}(B) - K)_+ [c''_4(\mathcal{V}^2 \sqrt{n} + \sigma^2 n) + (\delta^2 + \sqrt{c'_3(\log n)\sigma^2 \delta^2}) \sqrt{n} + \bar{\gamma}_n^2] + \hat{\kappa}(\text{tr}(B) - K) \end{aligned} \quad (\text{B.15})$$

From here, when  $\text{tr}(B) > K$ , the left-hand side of (A.2) is sufficient to ensure recovery. When  $\text{tr}(B) = K$ , we already established that  $\sum_{1 \leq k \neq l \leq K} |B_{G_k G_l}|_1 > 0$  for all matrices  $B \in \mathcal{C}_K \setminus \{B^*\}$  so (A.1) is sufficient in that case. Lastly note that  $K - \text{tr}(B) \leq \frac{1}{m} \sum_{1 \leq k \neq l \leq K} |B_{G_k G_l}|_1$  (see [1] eq. (57) p.21) so the right-hand side of (A.2) is sufficient condition for recovery when  $\text{tr}(B) - K < 0$ . This concludes the proof of Theorem A.2.  $\square$

### B.2.3 Proof of Lemma B.1

$$(\widehat{\Lambda} - \widehat{\Gamma})_{ab} = \langle X_a, X_b \rangle - \widehat{\Gamma}_{ab} = \langle \nu_a, \nu_b \rangle + \langle \nu_a, E_b \rangle + \langle \nu_b, E_a \rangle + \langle E_a, E_b \rangle - \widehat{\Gamma}_{ab} \quad (\text{B.16})$$

$$= \langle \nu_a, \nu_b \rangle + \langle \nu_a - \nu_b, E_b - E_a \rangle + \langle \nu_a, E_a \rangle + \langle \nu_b, E_b \rangle + (W_4 + W_5)_{ab} \quad (\text{B.17})$$

$$= \langle \nu_a, \nu_b \rangle + \langle \mu_k - \mu_l, E_b - E_a \rangle + (W_3)_{ab} + \langle \nu_a, E_a \rangle + \langle \nu_b, E_b \rangle + (W_4 + W_5)_{ab} \quad (\text{B.18})$$

$$= -\langle \mu_k, \mu_l \rangle + \langle \nu_a - \mu_k, \nu_b - \mu_l \rangle + \langle \nu_a, \mu_l \rangle + \langle \mu_k, \nu_b \rangle + \langle \mu_k - \mu_l, E_b - E_a \rangle + (W_3)_{ab} + \langle \nu_a, E_a \rangle + \langle \nu_b, E_b \rangle + (W_4 + W_5)_{ab} \quad (\text{B.19})$$

$$= -(S_1)_{ab} - \frac{1}{2}(|\mu_k|_2^2 + |\mu_l|_2^2) + (W_1)_{ab} + \langle \nu_a, \mu_l \rangle + \langle \mu_k, \nu_b \rangle + \langle \mu_k - \mu_l, E_b - E_a \rangle + (W_3)_{ab} + \langle \nu_a, E_a \rangle + \langle \nu_b, E_b \rangle + (W_4 + W_5)_{ab} \quad (\text{B.20})$$

$$= -(S_1)_{ab} - \frac{1}{2}(|\mu_k|_2^2 + |\mu_l|_2^2) + (W_1)_{ab} + \langle \nu_a, \mu_k \rangle + \langle \mu_l, \nu_b \rangle + \langle \mu_k - \mu_l, \nu_b - \nu_a + E_b - E_a \rangle + (W_3)_{ab} + \langle \nu_a, E_a \rangle + \langle \nu_b, E_b \rangle + (W_4 + W_5)_{ab} \quad (\text{B.21})$$

$$= -(S_1)_{ab} - \frac{1}{2}(|\mu_k|_2^2 + |\mu_l|_2^2) + (W_1)_{ab} + \langle \nu_a, \mu_k \rangle + \langle \mu_l, \nu_b \rangle + 2(S_1)_{ab} + (W_2)_{ab} + (W_3)_{ab} + \langle \nu_a, E_a \rangle + \langle \nu_b, E_b \rangle + (W_4 + W_5)_{ab} \quad (\text{B.22})$$

Now since  $(\langle \nu_a, \mu_k \rangle)_{(a,b) \in [n]^2} = (\langle \nu_a, \mu_k \rangle)_{a \in [n]} \times 1_n^T$ ,  $(|\mu_k|_2^2)_{(a,b) \in [n]^2} = (|\mu_k|_2^2)_{a \in [n]} \times 1_n^T$ ,  $(\langle \nu_b, \mu_l \rangle)_{(a,b) \in [n]^2} = 1_n \times (\langle \nu_b, \mu_l \rangle)_{b \in [n]}$ ,  $(|\mu_l|_2^2)_{(a,b) \in [n]^2} = 1_n \times (|\mu_l|_2^2)_{b \in [n]}$ ,  $(\langle \nu_a, E_a \rangle)_{(a,b) \in [n]^2} = (\langle \nu_a, E_a \rangle)_{a \in [n]} \times 1_n^T$ ,  $(\langle \nu_b, E_b \rangle)_{(a,b) \in [n]^2} = 1_n \times (\langle \nu_b, E_b \rangle)_{b \in [n]}$  and since  $B1_n = B^*1_n = (1_n^T B)^T = (1_n^T B^*)^T = 1_n$ , we have:

$$\langle \widehat{\Lambda} - \widehat{\Gamma}, B^* - B \rangle = \langle S_1 + W_1 + W_2 + W_3 + W_4 + W_5, B^* - B \rangle \quad (\text{B.23})$$

□

### B.2.4 Proof of Lemma B.2: control of $|\langle W_2, B^* - B \rangle|$

By definition,  $(W_2)_{ab} = 0$  when  $k = l$  and  $(B^*)_{ab} = 0$  when  $k \neq l$  so we have  $\langle W_2, B^* \rangle = 0$ . Let  $\langle A, B \rangle_{G_k G_l} = \sum_{(a,b) \in G_k \times G_l} A_{ab} B_{ab}$ , we have:

$$\langle W_2, B^* - B \rangle = -\langle W_2, B \rangle = - \sum_{1 \leq k \neq l \leq K} \langle W_2, B \rangle_{G_k G_l} \leq \sum_{1 \leq k \neq l \leq K} |W_2|_{G_k G_l}|B|_{G_k G_l}|_1 \quad (\text{B.24})$$

Let  $(a, b) \in G_k \times G_l$ , we look at  $(W_2)_{ab} = \langle E_b - E_a - (\nu_a - \mu_k) + (\nu_b - \mu_l), \mu_k - \mu_l \rangle = \langle E_a - E_b, \mu_k - \mu_l \rangle + \langle -(\nu_a - \mu_k) + (\nu_b - \mu_l), \mu_k - \mu_l \rangle$ . The term on the right is a constant offset bounded by  $2\delta|\mu_k - \mu_l|_2$ . Let  $z := \mu_k - \mu_l$ , by Lemma C.1  $\langle E_a - E_b, z \rangle$  is a subgaussian variable with variance bounded by  $(\sigma_k^2 + \sigma_l^2)|z|_2^2$  therefore its tails are characteristically bounded (see for example [4]), there exist  $c_* > 0$  absolute constant such that  $\forall t \geq 0$ :

$$\mathbb{P} \left[ |\langle E_b - E_a, z \rangle| \geq |z|_2 \sqrt{\sigma_k^2 + \sigma_l^2} \times t \right] \leq e^{1-c_* t^2} \quad (\text{B.25})$$

This implies that  $\forall t \geq 0$ ,  $\mathbb{P} \left[ |(W_2)_{ab}| \geq |\mu_k - \mu_l|_2 (2\delta + \sqrt{\sigma_k^2 + \sigma_l^2} \times t) \right] \leq e^{1-c_* t^2}$ . We conclude with a union bound over all  $(a, b) \in G_k \times G_l$ , a union bound over all  $(k, l) \in [K]^2$ ,  $k \neq l$  and by taking  $t = \sqrt{(1 + 3 \log n)/c_*}$ . □

### B.2.5 Proof of Lemma B.4: control of $|\langle W_4, B^* - B \rangle|$

Recall  $(W_4)_{ab} = \langle E_a, E_b \rangle - \Gamma_{ab}$ . We will prove Lemma B.4 by using the derivation of (B.6) combined with Lemma A.1 for control of the operator norm and the following lemma for the remaining part.

**Lemma B.5.** For  $c'_4 > 0$  absolute constant, with probability greater than  $1 - 1/n$ :

$$|B^*W_4|_\infty \leq c'_4 \times (\mathcal{V}^2 \sqrt{\log n} + \sigma^2 \log n) / \sqrt{m}. \quad (\text{B.26})$$

*Proof.* Let  $(a, b) \in G_k \times G_l$ , we rewrite  $(B^*W_4)_{ab}$  as the sum of the following two terms:

$$(B^*W_4)_{ab} = \frac{u_b}{|G_k|} \times \mathbf{1}_{k=l} + \langle \tilde{E}_k, E_b \rangle \text{ with } \begin{cases} u_b &:= |E_b|_2^2 - \Gamma_{bb} \\ \tilde{E}_k &:= \frac{1}{|G_k|} \sum_{c \in G_k, c \neq b} E_c \end{cases} \quad (\text{B.27})$$

The bound for  $u_b$  uses Lemma C.3:  $\forall t \geq 0 \mathbb{P}[| |E_b|_2^2 - \mathbb{E}|E_b|_2^2 | \geq \mathcal{V}_l^2 \sqrt{t} + \sigma_l^2 t] \leq 2e^{-c_* t}$  so only the scalar product remains to be controlled. Notice that by Lemma C.1,  $\sqrt{|G_k|} \tilde{E}_k$  is a centered subgaussian with variance-bounding matrix  $\tilde{\Sigma} = \frac{1}{|G_k|} \sum_{c \in G_k, c \neq b} \Sigma_c$ , therefore  $|\tilde{\Sigma}|_F \leq \mathcal{V}_k^2$  and  $|\tilde{\Sigma}|_{op} \leq \sigma_k^2$ . So using Lemma C.3 again we find  $\forall t \geq 0$ :

$$\mathbb{P}\left[2|\sqrt{|G_k|} \langle \tilde{E}_k, E_b \rangle| \geq \sqrt{2} |\tilde{\Sigma}, \Sigma_b|^{1/2} \sqrt{t} + |\tilde{\Sigma}^{1/2} \Sigma_b^{1/2}|_{op} t\right] \leq 2e^{-c_* t} \quad (\text{B.28})$$

Therefore using a union bound, then  $\langle \tilde{\Sigma}, \Sigma_b \rangle^{1/2} \leq \mathcal{V}_k \mathcal{V}_l \leq \mathcal{V}^2$  (Cauchy-Schwarz) and applying another union bound over all  $(a, b) \in [n]^2$  with  $t = (\log 4 + 3 \log n)/c_*$  yields the result.  $\square$

We are ready to wrap-up the proof. From Lemma A.1 applied to  $W_4$ , taking  $t = (\log 2 + n \log 9 + \log n)/c_*$  there exists  $c''_4 > 0$  absolute constant such that we have with probability greater than  $1 - 1/n$ :  $|W_4|_{op} \leq c''_4 (\mathcal{V}^2 \sqrt{n} + \sigma^2 n)$ . Now applying Lemma B.3 to  $W_4$ :

$$\begin{aligned} |\langle W_4, B^* - B \rangle| &\leq 6|B^*W_4|_\infty \sum_{1 \leq k \neq l \leq K} |B_{G_k G_l}|_1 \\ &\quad + |W_4|_{op} \left[ \sum_{1 \leq k \neq l \leq K} |B_{G_k G_l}|_1 / m + (\text{tr}(B) - K) \right] \end{aligned} \quad (\text{B.29})$$

Therefore combining the lemma with the derivations above and a union bound, we get with probability greater than  $1 - 2/n$ :

$$\begin{aligned} |\langle W_4, B^* - B \rangle| &\leq \left[ 6c'_4 (\mathcal{V}^2 \sqrt{\log n} + \sigma^2 \log n) / \sqrt{m} + c''_4 (\mathcal{V}^2 \sqrt{n} + \sigma^2 n) / m \right] \sum_{1 \leq k \neq l \leq K} |B_{G_k G_l}|_1 \\ &\quad + (\text{tr}(B) - K) c''_4 (\mathcal{V}^2 \sqrt{n} + \sigma^2 n) \end{aligned} \quad (\text{B.30})$$

This concludes the proof for Lemma B.4.  $\square$

### B.3 Proof of Proposition 4, Gamma estimator $\hat{\Gamma}^{corr}$

Let  $a \in G_k, b_1 \in G_{l_1}, b_2 \in G_{l_2}$ , using decomposition (1) and  $2|xy| \leq x^2 + y^2$  we have for  $a \in [n]$ :

$$|\hat{\Gamma}_{aa} - \Gamma_{aa}| = |\langle X_a - X_{b_1}, X_a - X_{b_2} \rangle - \Gamma_{aa}| \leq U_1 + \frac{3}{2}U_2 + 2U_3 + 3U_4 \quad (\text{B.31})$$

$$\begin{aligned} \text{where: } U_1 &:= ||E_a|_2^2 - \Gamma_{aa}| \\ U_2 &:= |\nu_a - \nu_{b_1}|_2^2 + |\nu_a - \nu_{b_2}|_2^2 \\ U_3 &:= \sup_{(b,c) \in [n]^2} \left\langle \frac{\nu_a - \nu_c}{|\nu_a - \nu_c|_2}, E_b \right\rangle^2 \\ U_4 &:= \sup_{(b,c) \in [n]^2, b \neq c} |\langle E_b, E_c \rangle| \end{aligned}$$

Control of  $U_1 = ||E_a|_2^2 - \Gamma_{aa}|$ : by using the first inequality from Lemma C.3 with  $t = (2 \log n + \log 2)/c_*$  there exists  $c'_1 > 0$  such that with probability greater than  $1 - 1/n^2$ :

$$U_1 \leq c'_1 \times (\mathcal{V}_k^2 \sqrt{\log n} + \sigma_k^2 \log n) \quad (\text{B.32})$$

Control of  $U_3 = \sup_{(b,c) \in [n]^2} \left\langle \frac{\nu_a - \nu_c}{|\nu_a - \nu_c|_2}, E_b \right\rangle^2$ : write  $z = (\nu_a - \nu_c) / |\nu_a - \nu_c|_2$  and  $Y = \Sigma_b^{-1/2} E_b \sim \text{subg}(I_p)$  and  $A = \Sigma_b^{1/2} (zz^T) \Sigma_b^{1/2}$ , so that:  $\langle z, E_b \rangle^2 = E_b^T z z^T E_b = Y^T A Y$ .

Because  $|z|_2 = 1$  and  $zz^T$  is symmetric of rank 1 we have  $|A|_F = |A|_{op} = \text{tr}(A) \leq \sigma^2$  therefore we use Lemma C.2 with  $t = (4 \log n + \log 2)/c_*$  and then a union bound over all  $(b, c) \in [n]^2$  so that with probability greater than  $1 - 1/n^2$ :

$$U_3 \leq c'_3 \times \sigma^2 \log n \quad (\text{B.33})$$

Control of  $U_4 = \sup_{(b,c) \in [n]^2, b \neq c} |\langle E_b, E_c \rangle|$ : using the fact that  $E_b$  and  $E_c$  are independent and the second inequality of Lemma C.3 with  $t = (4 \log n + \log 2)/c_*$ , a union bound over all  $(b, c) \in [n]^2$ , there exists  $c'_4 > 0$  such that we have with probability greater than  $1 - 1/n^2$ :

$$U_4 \leq c'_4 \times (\sigma^2 \log n + \mathcal{V}^2 \sqrt{\log n}) \quad (\text{B.34})$$

Control of  $U_2 = |\nu_a - \nu_{b_1}|_2^2 + |\nu_a - \nu_{b_2}|_2^2$ : here we use the requirement that all groups are of length at least  $m \geq 3$ , there exist  $(a_1, a_2) \in G_k \setminus \{a\}$ ,  $(c, d) \in ([n] \setminus \{a, a_1, a_2\})^2$ , let  $Z = (X_c - X_d)/|X_c - X_d|_2$ . For  $a_u \in \{a_1, a_2\}$  we have  $\langle X_a - X_{a_u}, Z \rangle = \langle \nu_a - \nu_{a_u}, Z \rangle + \langle E_a - E_{a_u}, Z \rangle$ . By independence and Lemma C.1,  $\langle E_a - E_{a_u}, Z \rangle$  is subgaussian with variance bounded by  $2\sigma^2$ . Therefore using the subgaussian tail bounds of (B.25) and a union bound, there exists  $c'_2 > 0$  absolute constant such that with probability over  $1 - 1/n^2$ :  $V(a, a_1) \vee V(a, a_2) \leq 2\delta + c'_2 \sigma \sqrt{\log n}$ . Hence for  $b_u \in \{b_1, b_2\}$  with probability over  $1 - 1/n^2$ :

$$|\langle X_a - X_{b_u}, X_c - X_d \rangle| \leq (2\delta + c'_2 \sigma \sqrt{\log n}) |X_c - X_d|_2 \quad (\text{B.35})$$

Now suppose  $l_1 \neq k$ , choose  $c \in G_k \setminus \{a\}$ ,  $d \in G_{l_1} \setminus \{b_1\}$ . We have  $|X_c - X_d|_2 \leq |\mu_k - \mu_{l_1}|_2 + 2\delta + |E_c - E_d|_2$ . We also have  $\langle X_a - X_{b_1}, X_c - X_d \rangle = \langle \nu_a - \nu_{b_1} + E_a - E_{b_1}, \nu_c - \nu_d + E_c - E_d \rangle = \langle \mu_k - \mu_{l_1} + \delta_{ab} + E_a - E_{b_1}, \mu_k - \mu_{l_1} + \delta_{cd} + E_c - E_d \rangle$  for  $\delta_{ab} = (\nu_a - \nu_{b_1}) - (\mu_k - \mu_{l_1})$  and  $\delta_{cd} = (\nu_c - \nu_d) - (\mu_k - \mu_{l_1})$ . Therefore:

$$|\langle X_a - X_{b_1}, X_c - X_d \rangle| \geq |\mu_k - \mu_{l_1}|_2^2/2 - 4\delta |\mu_k - \mu_{l_1}|_2 \quad (\text{B.36})$$

$$\begin{aligned} & - \frac{1}{2} \left\langle \frac{\mu_k - \mu_{l_1}}{|\mu_k - \mu_{l_1}|_2}, E_c + E_a - E_d - E_{b_1} \right\rangle^2 - 2 \sup_{(b,c,d) \in [n]^3} \left\langle \frac{\delta_{cd}}{|\delta_{cd}|_2}, E_b \right\rangle^2 \\ & - 4U_4 - 12\delta^2 \\ & \geq |\mu_k - \mu_{l_1}|_2^2/2 - 4\delta |\mu_k - \mu_{l_1}|_2 - 8U'_3 - 2U''_3 - 4U_4 - 12\delta^2 \end{aligned} \quad (\text{B.37})$$

where  $U'_3 = \sup_{(b,l) \in [n] \times [K]} \left\langle \frac{\mu_k - \mu_l}{|\mu_k - \mu_l|_2}, E_b \right\rangle^2$ ,  $U''_3 = \sup_{(b,c,d) \in [n]^3} \left\langle \frac{\delta_{cd}}{|\delta_{cd}|_2}, E_b \right\rangle^2$ .

So combining the last derivations:

$$\begin{aligned} |\mu_k - \mu_{l_1}|_2^2/2 - 4\delta |\mu_k - \mu_{l_1}|_2 & \leq (2\delta + c'_2 \sigma \sqrt{\log n}) (|\mu_k - \mu_{l_1}|_2 + 2\delta + |E_c - E_d|_2) \\ & \quad + 8U'_3 + 2U''_3 + 4U_4 + 12\delta^2 \end{aligned} \quad (\text{B.38})$$

Notice that  $U'_3, U''_3$  can be controlled exactly as  $U_3$  was, and simultaneously: for  $c''_3 > 0$  absolute constant, with probability greater than  $1 - 1/n^2$ :  $8U'_3 + 2U''_3 \leq c''_3 \sigma^2 \log n$ .

We now control  $|E_c - E_d|_2$ : notice that by Lemma C.1,  $E_c - E_d$  is subg( $\Sigma_c + \Sigma_d$ ). We have  $\mathbb{E}[|E_c - E_d|_2^2] \leq \text{tr}(\Sigma_c + \Sigma_d) \leq 2\gamma^2$ ,  $|\Sigma_c + \Sigma_d|_F \leq 2\mathcal{V}^2 \leq 2\sigma\gamma$  and  $|\Sigma_c + \Sigma_d|_{op} \leq 2\sigma^2$ . Therefore by the first inequality of Lemma C.3 with  $t = (4 \log n + \log 2)/c_*$  and a union bound over all  $(c, d) \in [n]^2$ , there exists  $c''_2 > 0$  absolute constant such that we have simultaneously with probability greater than  $1 - 1/n^2$ :

$$\sup_{(c,d) \in [n]^2} |E_c - E_d|_2 \leq c''_2 \sqrt{\gamma^2 + \sigma\gamma \sqrt{\log n} + \sigma^2 \log n} \leq c''_2 (\gamma + \sigma \sqrt{\log n}) \quad (\text{B.39})$$

Therefore with a union bound, with probability greater than  $1 - 4/n^2$ :

$$\begin{aligned} |\mu_k - \mu_{l_1}|_2^2/2 - (c'_2 \sigma \sqrt{\log n} + 6\delta) |\mu_k - \mu_{l_1}|_2 & \leq (2\delta + c'_2 \sigma \sqrt{\log n}) (2\delta + \\ & \quad (\gamma + \sigma \sqrt{\log n}) (c''_2 + \frac{c''_3}{c'_2} + \frac{4c'_4}{c'_2})) + 12\delta^2 \end{aligned} \quad (\text{B.40})$$

Hence for  $c'_5 > 0$  absolute constant we have with probability greater than  $1 - 4/n^2$ :  $|\mu_k - \mu_{l_1}|_2^2 \leq c'_5(\delta + \sigma\sqrt{\log n})(\delta + \sigma\sqrt{\log n} + \gamma)$ . The same control can be derived simultaneously for  $|\mu_k - \mu_{l_2}|_2^2$  by replacing  $d \in G_{l_1} \setminus \{b_1\}$  by  $d' \in G_{l_2} \setminus \{b_1, b_2\}$ . We conclude that for  $c''_5 > 0$  absolute constant, we have with probability greater than  $1 - 4/n^2$ :

$$U_2 \leq 2|\mu_k - \mu_{l_1}|_2^2 + 2|\mu_k - \mu_{l_2}|_2^2 + 16\delta^2 \leq c''_5(\delta + \sigma\sqrt{\log n})(\delta + \sigma\sqrt{\log n} + \gamma) \quad (\text{B.41})$$

Therefore with a union bound over all four terms  $U_1, U_2, U_3, U_4$  and  $a \in [n]$ , for  $c_6, c_7 > 0$  absolute constants we have with probability greater than  $1 - c_6/n$ :  $|\hat{\Gamma} - \Gamma|_\infty \leq c_7(\delta + \sigma\sqrt{\log n})(\delta + \sigma\sqrt{\log n} + \gamma)$ . This concludes the proof of Proposition 4  $\square$

#### B.4 Proof of Proposition 2

For this proof we rely heavily on the proof of Theorem A.1: let  $\hat{\Gamma} = 0$  so that  $W_5 = \Gamma$ , notice that  $W_3$  and  $W_4$  are centered. We take expectation of (B.3), therefore proving  $\langle \Lambda + \Gamma, B^* - B \rangle > 0$  for all  $B \in \mathcal{C}_K \setminus \{B^*\}$  is equivalent to proving:

$$\langle S_1 + W_1 + \mathbb{E}[W_2] + \Gamma, B^* - B \rangle > 0 \text{ for all } B \in \mathcal{C}_K \setminus \{B^*\} \quad (\text{B.42})$$

Notice that for  $(a, b) \in G_k \times G_l$ ,  $\mathbb{E}[(W_2)_{ab}] \leq 2\delta|\mu_k - \mu_l|_2$ . Using this in combination with other arguments from the proof of Theorem A.1, that is using (B.4), (B.7) and (B.12), we have  $\forall B \in \mathcal{C}_K$ :

$$\langle S_1, B^* - B \rangle = \sum_{1 \leq k \neq l \leq K} \frac{1}{2} |\mu_k - \mu_l|_2^2 |B_{G_k G_l}|_1 \quad (\text{B.43})$$

$$|\langle W_1, B^* - B \rangle| \leq \sum_{1 \leq k \neq l \leq K} \delta^2(6 + \frac{\sqrt{n}}{m}) |B_{G_k G_l}|_1 \quad (\text{B.44})$$

$$|\langle \mathbb{E}[W_2], B^* - B \rangle| \leq \sum_{1 \leq k \neq l \leq K} 2\delta|\mu_k - \mu_l|_2 |B_{G_k G_l}|_1 \quad (\text{B.45})$$

$$|\langle W_5, B^* - B \rangle| \leq \sum_{1 \leq k \neq l \leq K} \frac{7|\Gamma|_V}{2m} |B_{G_k G_l}|_1 \quad (\text{B.46})$$

Thus we have:

$$\begin{aligned} \langle S_1 + W_1 + \mathbb{E}[W_2] + W_5, B^* - B \rangle &\geq \sum_{1 \leq k \neq l \leq K} \left[ \frac{1}{2} |\mu_k - \mu_l|_2^2 - 2\delta|\mu_k - \mu_l|_2 \right. \\ &\quad \left. - \delta^2(6 + \frac{\sqrt{n}}{m}) - \frac{7|\Gamma|_V}{2m} \right] |B_{G_k G_l}|_1 \end{aligned} \quad (\text{B.47})$$

Hence we deduce that there exist  $c_0$  absolute constant such that if  $\rho^2(\mathcal{G}, \mu, \delta) > c_0(6 + \sqrt{n}/m)$  and  $m\Delta^2(\mu) > 8|\Gamma|_V$ , then we have  $\arg \max_{B \in \mathcal{C}_K} \langle \Lambda + \Gamma, B \rangle = B^*$ . Lastly as  $B^*$  is in  $\mathcal{C}_K^{\{0,1\}} \subset \mathcal{C}_K$ , this concludes the proof.  $\square$

#### B.5 Proof of Proposition 3

Assume  $X_1, \dots, X_n$  is  $(\mathcal{G}, \mu, \delta)$ -clustered with characterizing matrix  $B^*$  and define the following:

- $\delta = 0$  implying maximum discriminating capacity for  $\mathcal{G}$  ie  $\rho(\mathcal{G}, \mu, \delta) = +\infty$ .
- Let

$$B^* := \begin{bmatrix} \boxed{\frac{1}{m}} & & \\ & \boxed{\frac{1}{m}} & \\ & & \boxed{\frac{1}{m}} \end{bmatrix} \in \mathcal{C}_K^{\{0,1\}} \text{ and } B_1 := \begin{bmatrix} \boxed{2/m} & & \\ & \boxed{2/m} & \\ & & \boxed{\frac{1}{2m}} \end{bmatrix} \in \mathcal{C}_K^{\{0,1\}}$$

where  $\boxed{\frac{1}{m}}$  represents constant square blocks of size  $m$  and value  $1/m$ , and the other values in the matrices are zeros.



- $K = 3$  and for some  $\Delta > 0$ ,  $\mu_1 = (\Delta/\sqrt{2}, 0, 0)^T$  and  $\mu_2 = (0, \Delta/\sqrt{2}, 0)^T$ ,  $\mu_3 = (0, 0, \Delta/\sqrt{2})^T$  so that for  $(a, b) \in G_k \times G_l$ :  $\Lambda_{ab} = \langle \mu_k, \mu_l \rangle = \Delta^2/2 \times \mathbf{1}\{a \stackrel{g}{\sim} b\}$ . Then  $\Delta^2(\mu) = \Delta^2$  and  $\Lambda = (\Delta^2/2)mB^*$ .
- For  $\gamma_+ > \gamma_- > 0$  let  $\Gamma = \text{diag}(\underbrace{\gamma_+, \dots, \gamma_+}_m, \underbrace{\gamma_-, \dots, \gamma_-}_m, \underbrace{\gamma_-, \dots, \gamma_-}_m)$

Then we have the following:  $\langle B^*, \Gamma \rangle = \gamma_+ + 2\gamma_-$ ,  $\langle B_1, \Gamma \rangle = 2\gamma_+ + \gamma_-$ ,  $\langle B^*, \Lambda \rangle = \Delta^2/2 \times 3m$ ,  $\langle B_1, \Lambda \rangle = \Delta^2/2 \times 2m$ . Thus we have  $\langle B^*, \Lambda + \Gamma \rangle < \langle B_1, \Lambda + \Gamma \rangle$  as soon as  $m\Delta^2(\mu) < 2(\gamma_+ - \gamma_-)$ . This concludes the proof.  $\square$

## C Subgaussian properties and controls

**Lemma C.1.**  $\forall a \in [n]$  let  $Y_a \sim \text{subg}(\Sigma_a)$ , independent,  $\Sigma_a \in \mathbb{R}^{d \times d}$  then

$$Y = (Y_1^T, \dots, Y_n^T)^T \sim \text{subg}(\text{diag}(\Sigma_a)_{a \in [n]}), \quad (\text{C.1})$$

$$Z = \sum_{a \in [n]} c_a Y_a \sim \text{subg}(\sum_{a \in [n]} c_a^2 \Sigma_a). \quad (\text{C.2})$$

*Proof.* By independence for  $z = \{z_1^T, \dots, z_n^T\}^T \in \mathbb{R}^{nd}$ ,  $z_a \in \mathbb{R}^d$  we have

$$\begin{aligned} \mathbb{E} \left[ e^{z^T (Y - \mathbb{E} Y)} \right] &= \prod_{a=1}^n \mathbb{E} \left[ e^{z_a^T (Y_a - \mathbb{E} Y_a)} \right] \leq \prod_{a=1}^n e^{z_a^T \Sigma_a z_a / 2} = e^{z^T \text{diag}(\Sigma_a)_{a \in [n]} z / 2} \\ \mathbb{E} \left[ e^{z_1^T (Z - \mathbb{E} Z)} \right] &= \prod_{a=1}^n \mathbb{E} \left[ e^{z_1^T c_a (Y_a - \mathbb{E} Y_a)} \right] \leq \prod_{a=1}^n e^{z_1^T c_a^2 \Sigma_a z_1 / 2} = e^{z_1^T (\sum_{a \in [n]} c_a^2 \Sigma_a) z_1 / 2} \end{aligned}$$

$\square$

**Lemma C.2.** *Hanson-Wright inequality for subgaussian variables*

Let  $Y$  be a centered random vector,  $Y \sim \text{subg}(I_d)$ , let  $A$  be a matrix of size  $d \times d$ . There exists  $c_* > 0$  such that for any  $t \geq 0$

$$\mathbb{P} \left[ |Y^T A Y - \mathbb{E} [Y^T A Y]| \geq |A|_F \sqrt{t} + |A|_{op} t \right] \leq 2e^{-c_* t}. \quad (\text{C.3})$$

*Proof.* A variation of the original Hanson-Wright inequality (Theorem 1.1 from [3]), it holds as  $\sigma = 1$  bounds the subgaussian norm  $|Y|_{\Psi_2} := \sup_{x \in S_{d-1}} \sup_{p \geq 1} p^{-1/2} (\mathbb{E} |x^T Y|^p)^{1/p}$ , a consequence of Lemma 5.5 from [4].  $\square$

**Lemma C.3.** *Subgaussian quadratic forms*

Let  $E, E'$  be centered, independent random vectors,  $E \sim \text{subg}(\Sigma)$ ,  $E' \sim \text{subg}(\Sigma')$ , then for  $t \geq 0$

$$\mathbb{P} \left[ ||E|_2^2 - \mathbb{E} |E|_2^2| \geq |\Sigma|_F \sqrt{t} + |\Sigma|_{op} t \right] \leq 2e^{-c_* t} \quad (\text{C.4})$$

$$\mathbb{P} \left[ 2|\langle E, E' \rangle| \geq \sqrt{2} \langle \Sigma, \Sigma' \rangle^{1/2} \sqrt{t} + |\Sigma^{1/2} \Sigma'^{1/2}|_{op} t \right] \leq 2e^{-c_* t}. \quad (\text{C.5})$$

*Proof.* For the first inequality, we use Lemma C.2 with  $Y = \Sigma^{-1/2} E$  and  $A = \Sigma$ . As for the second inequality, by Lemma C.1 we have  $Y = (E^T \Sigma^{-1/2}, E'^T \Sigma'^{-1/2})^T \sim \text{subg}(I_{2d})$ . Then let us use Lemma C.2 with

$$A = \begin{pmatrix} 0 & \Sigma^{1/2} \Sigma'^{1/2} \\ \Sigma'^{1/2} \Sigma^{1/2} & 0 \end{pmatrix}$$

Notice that  $|A|_F^2 = 2\langle \Sigma, \Sigma' \rangle$  and  $|A|_{op} \leq |\Sigma^{1/2} \Sigma'^{1/2}|_{op}$  so the results follow.  $\square$

**Proof of Lemma A.1: concentration of random subgaussian Gram matrices.**

Let  $W := \mathbf{E}\mathbf{E}^T - \mathbb{E}[\mathbf{E}\mathbf{E}^T]$ . Using the epsilon-net method as in Lemma 4.2 from [2], let  $\mathcal{N}$  be a  $1/4$ -net for  $\mathcal{S}_{n-1}$  such that  $|\mathcal{N}| \leq 9^n$  (see Lemma 5.2 [4]), we have for  $u, v \in \mathcal{S}_{n-1}^2$ :  $u^T W v \leq \max_{x \in \mathcal{N}} x^T W v + \frac{1}{4} \max_{u \in \mathcal{S}_{n-1}} u^T W v \leq \max_{x, y \in \mathcal{N}^2} x^T W y + \frac{1}{2} \max_{u, v \in \mathcal{S}_{n-1}^2} u^T W v$  hence

$$|W|_{op} \leq 2 \max_{x, y \in \mathcal{N}^2} x^T W y \quad \text{and} \quad \mathbb{P}[|W|_{op} \geq t] \leq \sum_{x, y \in \mathcal{N}^2} \mathbb{P}[x^T W y \geq t/2] \quad (\text{C.6})$$

Notice that this rewrites  $x^T W y = \sum_{a=1}^n \sum_{b=1}^n x_a (E_a^T E_b - \Gamma_{ab}) y_b = (\sum_{a=1}^n E_a^T x_a) (\sum_{b=1}^n E_b^T y_b)^T - \mathbb{E}(\sum_{a=1}^n E_a^T x_a) (\sum_{b=1}^n E_b^T y_b)^T$ . For  $x, y \in \mathcal{N}^2$ , let  $x \otimes \Sigma^{1/2} := (x_1 \Sigma_1^{1/2}, \dots, x_n \Sigma_n^{1/2})^T \in \mathbb{R}^{np \times p}$  and  $Y = (E_1^T \Sigma_1^{-1/2}, \dots, E_n^T \Sigma_n^{-1/2})^T \in \mathbb{R}^{np \times 1}$  (by Lemma C.1 we have  $Y \sim \text{subg}(I_{np})$ ). We have

$$x^T W y = Y^T (x \otimes \Sigma^{1/2}) (y \otimes \Sigma^{1/2})^T Y - \mathbb{E}[Y^T (x \otimes \Sigma^{1/2}) (y \otimes \Sigma^{1/2})^T Y] \quad (\text{C.7})$$

Now define  $A := (x \otimes \Sigma^{1/2}) (y \otimes \Sigma^{1/2})^T$ : we have  $|A|_{op} \leq \max_{a \in [n]} |\Sigma_a|_{op}$  because for  $z \in \mathbb{R}^p$ ,  $|(x \otimes \Sigma^{1/2}) z|_2^2 = \sum_{b=1}^n x_b^2 |\Sigma_b^{1/2} z|_2^2 \leq \max_{a \in [n]} |\Sigma_a|_{op} |z|_2^2$ . As for the Frobenius norm, by Cauchy-Schwarz:  $|(x \otimes \Sigma^{1/2}) (y \otimes \Sigma^{1/2})^T|_F^2 = \sum_{a=1}^n \sum_{b=1}^n x_a^2 y_b^2 |\Sigma_a^{1/2} \Sigma_b^{1/2}|_F^2 \leq \max_{a \in [n]} |\Sigma_a|_F^2$ . Therefore using Lemma C.2 on  $Y$  we have  $\forall t \geq 0 : \mathbb{P}[|Y^T A Y - \mathbb{E}[Y^T A Y]| \geq \max_{a \in [n]} |\Sigma_a|_F \sqrt{t} + \max_{a \in [n]} |\Sigma_a|_{op} t] \leq 2e^{-ct}$ . Hence in conjunction with (C.6) we conclude the proof.  $\square$

## References

- [1] F. Bunea, C. Giraud, M. Royer, and N. Verzelen. PECOK: a convex optimization approach to variable clustering. *arXiv e-prints arXiv:1606.05100*, June 2016.
- [2] P. Rigollet. *High-Dimensional Statistics*. Massachusetts Institute of Technology: MIT OpenCourseWare, Spring 2015.
- [3] Mark Rudelson and Roman Vershynin. Hanson-wright inequality and sub-gaussian concentration. *Electron. Commun. Probab.*, 18:no. 82, 1–9, 2013.
- [4] R. Vershynin. *Introduction to the non-asymptotic analysis of random matrices*. Chapter 5 of: Compressed Sensing, Theory and Applications. Cambridge University Press, 2012.
